# Supplementary material
Source: PubMed Central journal article supplement (PMC2863190)
Supplement: supp_M109.091710_jbc.M109.091710-1.pdf [file supp_M109.091710_jbc.M109.091710-1.pdf]

**SUPPLEMENTARY MATERIAL FOR**  
**THE METABOLIC RESPONSE TO IRON DEFICIENCY IN**  
**SACCHAROMYCES CEREVISIAE.**

Minoo Shakoury-Elizeh<sup>1</sup>, Olga Protchenko<sup>1</sup>, Alvin Berger<sup>2</sup>, James Cox<sup>3</sup>, Kenneth Gable<sup>4</sup>,  
Teresa M. Dunn<sup>4</sup>, Will Prinz<sup>5</sup>, Martin Bard<sup>6</sup>, and Caroline C. Philpott<sup>1</sup>

<sup>1</sup>Liver Diseases Branch and <sup>5</sup>Laboratory of Cell Biology and Biochemistry, NIDDK,  
NIH, Bethesda, MD, USA

<sup>2</sup>Metabolon, Inc., Durham, NC

<sup>3</sup>University of Utah, Salt Lake City, UT

<sup>4</sup>Department of Biochemistry and Molecular Biology, Uniformed Services University of  
the Health Sciences, Bethesda, MD

<sup>6</sup>Department of Biology, Indiana University-Purdue University Indianapolis,  
Indianapolis, IN

**Table S1. Metabolite Analysis of Yeast Grown in Defined-Iron Minimal Media**

| Super Pathway                         | Sub Pathway                                      | Name                            | Kegg      | HMDB      | 10 Fe<br>4 hr /<br>100<br>Fe | 10 Fe<br>/ 100<br>Fe | 300<br>Fe 4<br>hr /<br>100<br>Fe | 300<br>Fe /<br>100<br>Fe | 10 Fe<br>/ 300<br>Fe |
|---------------------------------------|--------------------------------------------------|---------------------------------|-----------|-----------|------------------------------|----------------------|----------------------------------|--------------------------|----------------------|
|                                       |                                                  |                                 |           |           | B/A                          | C/A                  | D/A                              | E/A                      | C/E                  |
| Amino acid                            | Glycine, serine and<br>threonine metabolism      | glycine                         | C00037    | HMDB00123 | 0.91                         | 1.84                 | 0.62                             | 0.76                     | 2.44                 |
|                                       |                                                  | glycine                         | C00037    | HMDB00123 | 1.03                         | 1.52                 | 0.73                             | 0.68                     | 2.22                 |
|                                       |                                                  | N-acetylglycine                 |           | HMDB00532 | 1.13                         | 1.32                 | 0.68                             | 0.88                     | 1.49                 |
|                                       |                                                  | serine                          | C00065    | HMDB03406 | 0.9                          | 0.94                 | 1.03                             | 1.07                     | 0.88                 |
|                                       |                                                  | O-acetylhomoserine              | C01077    |           | 1.02                         | 1.48                 | 0.91                             | 0.93                     | 1.59                 |
|                                       |                                                  | threonine                       | C00188    | HMDB00167 | 1                            | 1.42                 | 0.94                             | 0.89                     | 1.59                 |
|                                       |                                                  | allo-threonine                  | C05519    | HMDB04041 | 0.82                         | 2.54                 | 1.03                             | 1.67                     | 1.52                 |
|                                       | Alanine and aspartate<br>metabolism              | alanine                         | C00041    | HMDB00161 | 1.17                         | 1.79                 | 1.18                             | 1.02                     | 1.75                 |
|                                       |                                                  | aspartate                       | C00049    | HMDB00191 | 0.92                         | 0.94                 | 1.13                             | 0.95                     | 0.99                 |
|                                       |                                                  | N-carbamoylaspartate            | C00438    | HMDB00828 | 0.37                         | 1.4                  | 0.54                             | 0.67                     | 2.08                 |
|                                       |                                                  | asparagine                      | C00152    | HMDB00168 | 1.04                         | 1.91                 | 1.06                             | 1.13                     | 1.69                 |
|                                       | Glutamate metabolism                             | glutamate                       | C00025    | HMDB03339 | 0.96                         | 0.74                 | 1.09                             | 1.03                     | 0.72                 |
|                                       |                                                  | glutamine                       | C00064    | HMDB00641 | 1.17                         | 1                    | 1.2                              | 1.02                     | 0.98                 |
|                                       |                                                  | N-acetylglutamate               | C00624    |           | 1.06                         | 0.46                 | 1.2                              | 1.01                     | 0.46                 |
|                                       | Histidine metabolism                             | histidine                       | C00135    | HMDB00177 | 0.95                         | 1.15                 | 0.91                             | 0.88                     | 1.32                 |
|                                       | Lysine metabolism                                | lysine                          | C00047    | HMDB00182 | 0.66                         | 0.78                 | 0.79                             | 0.93                     | 0.83                 |
|                                       |                                                  | 2-aminoadipate                  | C00956    | HMDB00510 | 0.6                          | 2.5                  | 0.45                             | 0.69                     | 3.57                 |
|                                       |                                                  | saccharopine                    | C00449    | HMDB00279 | 0.6                          | 0.75                 | 0.97                             | 0.63                     | 1.19                 |
|                                       | Phenylalanine & tyrosine<br>metabolism           | phenylalanine                   | C00079    | HMDB00159 | 0.89                         | 1.58                 | 1.24                             | 1.16                     | 1.35                 |
|                                       |                                                  | tyrosine                        | C00082    | HMDB00158 | 0.97                         | 1.98                 | 1.44                             | 1.44                     | 1.37                 |
|                                       |                                                  | tyrosine                        | C00082    | HMDB00158 | 0.97                         | 1.8                  | 1.47                             | 1.36                     | 1.33                 |
|                                       | Tryptophan metabolism                            | kynurenine                      | C00328    | HMDB00183 | 0.64                         | 0.98                 | 1.04                             | 1.16                     | 0.85                 |
|                                       |                                                  | tryptophan                      | C00078    | HMDB00929 | 1.1                          | 2.53                 | 1.43                             | 1.5                      | 1.69                 |
|                                       |                                                  | 3-hydroxykynurenine             | C02794    | HMDB00732 | 1.04                         | 0.27                 | 1.89                             | 2.05                     | 0.13                 |
|                                       | Valine, leucine and<br>isoleucine metabolism     | isoleucine                      | C00407    | HMDB00172 | 1.1                          | 1.57                 | 1.03                             | 0.97                     | 1.61                 |
|                                       |                                                  | leucine                         | C00123    | HMDB00687 | 1.17                         | 2.44                 | 1.28                             | 1.37                     | 1.79                 |
|                                       |                                                  | valine                          | C00183    | HMDB00883 | 1.28                         | 1.58                 | 1.07                             | 0.93                     | 1.69                 |
|                                       | Cysteine, methionine,<br>SAM, taurine metabolism | cysteine                        | C00097    | HMDB00574 | 0.92                         | 1.74                 | 1.29                             | 1.34                     | 1.30                 |
|                                       |                                                  | cystathionine                   | C02291    | HMDB00099 | 1.49                         | 0.75                 | 1.93                             | 1.3                      | 0.58                 |
|                                       |                                                  | S-adenosylmethionine<br>(SAM)   | C00019    | HMDB01185 | 1.31                         | 1.49                 | 1.67                             | 0.8                      | 1.85                 |
|                                       |                                                  | S-adenosylhomocysteine<br>(SAH) | C00021    | HMDB00939 | 1.11                         | 1.07                 | 1.46                             | 1.19                     | 0.91                 |
|                                       |                                                  | methionine                      | C00073    | HMDB00696 | 0.91                         | 1.22                 | 1.16                             | 1.13                     | 1.08                 |
|                                       |                                                  | homocystine                     | C01817    | HMDB00676 | 1.46                         | 0.96                 | 0.99                             | 0.78                     | 1.23                 |
|                                       | Urea cycle; arginine-,<br>proline-, metabolism   | N,N-dimethylarginine<br>(ADMA)  | C03626    | HMDB01539 | 0.85                         | 1.2                  | 1.25                             | 1.18                     | 1.02                 |
|                                       |                                                  | arginine                        | C00062    | HMDB03416 | 1.05                         | 1.13                 | 1.08                             | 1.01                     | 1.11                 |
|                                       |                                                  | ornithine                       | C00077    | HMDB03374 | 0.86                         | 0.77                 | 0.97                             | 0.96                     | 0.80                 |
|                                       |                                                  | urea                            | C00086    | HMDB00294 | 0.62                         | 0.69                 | 0.75                             | 0.46                     | 1.49                 |
|                                       |                                                  | proline                         | C00148    | HMDB00162 | 1.06                         | 0.9                  | 1.15                             | 1.05                     | 0.85                 |
|                                       |                                                  | citrulline                      | C00327    | HMDB00904 | 1.08                         | 1.17                 | 1.17                             | 1.1                      | 1.06                 |
|                                       |                                                  | trans-4-hydroxyproline          | C01157    | HMDB00725 | 0.91                         | 0.75                 | 0.85                             | 1.05                     | 0.71                 |
|                                       |                                                  | argininosuccinate               | C03406    | HMDB01006 | 1.08                         | 2.35                 | 1.71                             | 0.82                     | 2.86                 |
|                                       | Creatine metabolism                              | creatine                        | C00300    | HMDB00064 | 0.63                         | 1.31                 | 0.49                             | 0.91                     | 1.43                 |
| Butanoate metabolism                  | 2-aminobutyrate                                  | C02261                          | HMDB00581 | 0.98      | 1.21                         | 0.95                 | 0.86                             | 1.41                     |                      |
| Polyamine metabolism                  | 5-methylthioadenosine<br>(MTA)                   | C00170                          | HMDB01173 | 1.79      | 2.43                         | 2.19                 | 1.73                             | 1.41                     |                      |
|                                       | putrescine                                       | C00134                          | HMDB01414 | 0.72      | 0.73                         | 0.78                 | 0.55                             | 1.32                     |                      |
| Guanidino and acetamido<br>metabolism | 1-methylguanidine                                | C02294                          | HMDB01522 | 1.03      | 1.32                         | 1.09                 | 0.93                             | 1.43                     |                      |
| Glutathione metabolism                | glutathione, reduced<br>(GSH)                    | C00051                          | HMDB00125 | 1.04      | 0.94                         | 1.24                 | 1.07                             | 0.88                     |                      |
|                                       | 5-oxoproline                                     | C01879                          | HMDB00267 | 0.99      | 0.86                         | 1.12                 | 1                                | 0.85                     |                      |
|                                       | glutathione, oxidized<br>(GSSG)                  | C00127                          | HMDB03337 | 0.97      | 0.72                         | 1.17                 | 1                                | 0.72                     |                      |



|             |                                            |                                                       |              |           |           |      |      |      |      |
|-------------|--------------------------------------------|-------------------------------------------------------|--------------|-----------|-----------|------|------|------|------|
|             |                                            | monophosphate (GMP)                                   |              |           |           |      |      |      |      |
|             | Pyrimidine metabolism, cytidine containing | cytidine                                              | C00475       | HMDB00089 | 1         | 0.96 | 1.09 | 0.96 | 1.01 |
|             | Pyrimidine metabolism, orotate containing  | orotate                                               |              | HMDB00226 | 0.66      | 1.71 | 1.13 | 1.51 | 1.14 |
|             |                                            | orotidine 5'-phosphate                                | C01103       | HMDB00218 | 0.8       | 0.83 | 1.02 | 0.98 | 0.84 |
|             | Pyrimidine metabolism, thymine containing  | thymidine                                             |              | HMDB00273 | 0.91      | 0.87 | 1.46 | 1.09 | 0.80 |
|             | Pyrimidine metabolism, uracil containing   | uracil                                                | C00106       | HMDB00300 | 0.77      | 0.58 | 0.9  | 0.72 | 0.81 |
|             |                                            | uridine                                               | C00299       | HMDB00296 | 1.97      | 1.24 | 1.99 | 1.41 | 0.88 |
|             |                                            | uridine 5'-monophosphate (UMP)                        | C00105       | HMDB00288 | 1.62      | 1.39 | 1.15 | 0.87 | 1.59 |
|             | Hemoglobin and porphyrin metabolism        | porphobilinogen                                       | C00931       | HMDB00245 | 0.58      | 0.81 | 0.69 | 0.96 | 0.85 |
|             |                                            | 5-aminolevulinatate                                   | C00430       | HMDB01149 | 0.64      | 1.15 | 0.48 | 0.83 | 1.39 |
|             | Nicotinate and nicotinamide metabolism     | nicotinamide                                          | C00153       | HMDB01406 | 0.86      | 0.78 | 0.71 | 0.56 | 1.37 |
|             |                                            | nicotinamide ribonucleotide (NMN)                     |              | HMDB00229 | 0.59      | 0.78 | 1.5  | 1.01 | 0.77 |
|             |                                            | nicotinamide adenine dinucleotide (NAD <sup>+</sup> ) | C00003       | HMDB00902 | 0.98      | 1.25 | 0.99 | 0.92 | 1.35 |
|             |                                            | nicotinamide adenine dinucleotide reduced (NADH)      | C00004       | HMDB01487 | 1.26      | 1.03 | 1.14 | 1.22 | 0.85 |
|             |                                            | nicotinate                                            | C00253       | HMDB01488 | 1.01      | 0.85 | 1.17 | 1.07 | 0.79 |
|             |                                            | Pantothenate and CoA metabolism                       | pantothenate | C00864    | HMDB00210 | 0.83 | 0.68 | 0.87 | 0.93 |
|             |                                            | phosphopantetheine                                    |              |           | 1.04      | 0.91 | 1.17 | 0.92 | 1.00 |
|             | Pyridoxal metabolism                       | pyridoxal                                             | C00250       | HMDB01545 | 0.96      | 0.73 | 1.24 | 1.05 | 0.69 |
|             | Riboflavin metabolism                      | riboflavin (Vitamin B2)                               | C00255       | HMDB00244 | 1.29      | 0.99 | 1.29 | 1.21 | 0.83 |
|             | Thiamine metabolism                        | thiamin (Vitamin B1)                                  | C00378       | HMDB00235 | 0.97      | 0.79 | 1.44 | 1.09 | 0.72 |
|             |                                            | 5-(2-Hydroxyethyl)-4-methylthiazole                   | C04294       |           | 1.43      | 1.14 | 1.16 | 1.02 | 1.11 |
|             | Vitamin B6 metabolism                      | pyridoxine (Vitamin B6)                               | C00314       | HMDB02075 | 1.03      | 0.95 | 1.16 | 1.12 | 0.85 |
| Xenobiotics | Chemical                                   | glycerol-2-phosphate                                  | C02979       | HMDB02520 | 1.02      | 1    | 1.36 | 1.27 | 0.79 |
|             | Drug                                       | citramalate                                           | C02612       | HMDB00426 | 0.52      | 1.11 | 1.26 | 1.16 | 0.95 |
| No Pathway  | No Pathway                                 | pyridine-4-carboxaldoxime                             |              |           | 0.95      | 0.66 | 0.9  | 0.81 | 0.82 |

| Sample Group | Growth Condition    | Number of Samples |
|--------------|---------------------|-------------------|
| A            | 100 mM Iron         | 6                 |
| B            | 10 mM Iron, 4 hrs   | 6                 |
| C            | 10 mM Iron, 18 hrs  | 6                 |
| D            | 300 mM Iron, 4 hrs  | 6                 |
| E            | 300 mM Iron, 18 hrs | 6                 |

Data presented are paired comparisons as indicated and represent fold-change of mean values normalized to total protein of sample. Values with  $p < 0.05$  indicated in red or green box, data with  $p > 0.05$  and  $< 0.1$ , blue text.

Green box indicates decreased fold-change, red indicates increased fold-change.

Table S2. Regulation of respiration-related transcripts in iron deficiency.

| <b>Respiration Transcripts Down-Regulated in Iron Deficiency</b> |                    |                                                           |
|------------------------------------------------------------------|--------------------|-----------------------------------------------------------|
| <b>Gene</b>                                                      | <b>Fold Change</b> | <b>Function</b>                                           |
| CYC1                                                             | 13.25 <sup>1</sup> | Cytochrome c, isoform 1                                   |
| CYT1                                                             | 6.52               | Cytochrome c1                                             |
| CYC7                                                             | 5.61               | Cytochrome c isoform 2                                    |
| COA2                                                             | 4.72               | Cytochrome oxidase assembly factor                        |
| RIP1                                                             | 4.43               | Ubiquinol-cytochrome-c reductase                          |
| YJL045W                                                          | 3.70               | Minor succinate dehydrogenase isozyme                     |
| SDH4                                                             | 3.54               | Membrane anchor subunit of succinate dehydrogenase        |
| QCR10                                                            | 3.42               | Subunit of the ubiquinol-cytochrome c oxidoreductase      |
| SDH3                                                             | 3.41               | Cytochrome b subunit of succinate dehydrogenase           |
| COX6                                                             | 2.82               | Subunit VI of cytochrome c oxidase                        |
| QCR2                                                             | 2.64               | Subunit 2 of the ubiquinol cytochrome-c reductase         |
| QCR8                                                             | 2.59               | Subunit 8 of ubiquinol cytochrome-c reductase complex     |
| NDI1                                                             | 2.52               | NADH:ubiquinone oxidoreductase                            |
| COR1                                                             | 2.46               | Core subunit ubiquinol-cytochrome c reductase             |
| QCR7                                                             | 2.42               | Subunit 7 of the ubiquinol cytochrome-c reductase         |
| CBP4                                                             | 2.34               | Required for assembly of ubiquinol cytochrome-c reductase |
| CBP6                                                             | 2.24               | Mitochondrial translational activator of the COB mRNA     |
| COX4                                                             | 2.24               | Subunit IV of cytochrome c oxidase                        |
| QCR9                                                             | 2.03               | Subunit 9 of the ubiquinol cytochrome-c reductase         |
| CYB2                                                             | 2.00               | Cytochrome b2 (L-lactate cytochrome-c oxidoreductase)     |
| COX5A                                                            | 1.93               | Subunit Va of cytochrome c oxidase                        |
| COX8                                                             | 1.91               | Subunit VIII of cytochrome c oxidase                      |
| CBP3                                                             | 1.83               | Required for assembly of ubiquinol cytochrome-c reductase |
| CYT2                                                             | 1.85               | Cytochrome c1 heme lyase                                  |
| PET100                                                           | 1.80               | Assembly of cytochrome c oxidase                          |
| COX15                                                            | 1.78               | Hydroxylation of heme O to form heme A                    |
| RSF1                                                             | 1.68               | Protein required for respiratory growth                   |
| COX7                                                             | 1.66               | Subunit VII of cytochrome c oxidase                       |
| PET20                                                            | 1.63               | Required for respiratory growth under some conditions     |
| COX17                                                            | 1.55               | Copper metallochaperone for Sco1p and Cox11p              |

| <b>TCA Cycle Transcripts Down-Regulated in Iron Deficiency</b> |                    |                                                              |
|----------------------------------------------------------------|--------------------|--------------------------------------------------------------|
| <b>Gene</b>                                                    | <b>Fold Change</b> | <b>Function</b>                                              |
| ACO1                                                           | 1.71               | Mitochondrial aconitase                                      |
| ACO2                                                           | 1.91               | Putative mitochondrial aconitase isozyme                     |
| KGD1                                                           | 1.64               | Component of mitochondrial alpha-ketoglutarate dehydrogenase |
| SDH1                                                           | 7.07               | Flavoprotein subunit of succinate dehydrogenase              |
| SDH2                                                           | 5.01               | Iron-sulfur protein subunit of succinate dehydrogenase       |
| SDH3                                                           | 3.41               | Cytochrome b subunit of succinate dehydrogenase              |
| SDH4                                                           | 3.54               | Membrane anchor subunit of succinate dehydrogenase           |

<sup>1</sup>Arrays were performed in triplicate and the average fold change is shown. Transcripts with 1.5-fold or greater change and  $p < 0.05$  shown.

Figure S2.

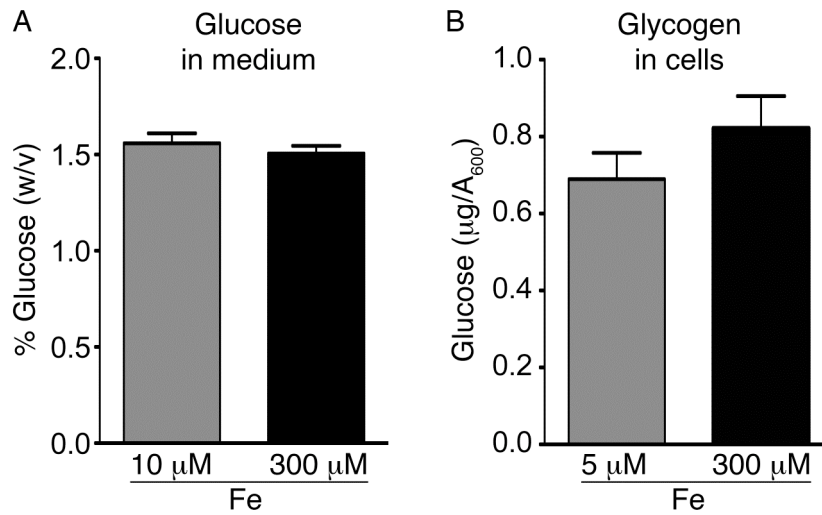

**Figure S2. Lack of glucose depletion in medium and lack of change in glycogen storage in iron deficient cells.** (A) No depletion of glucose in medium. Glucose levels in conditioned medium from steady state, low- and high-iron cells grown for metabolite analysis (Figure S1) was measured. (B) Similar levels of cellular glycogen in iron-deficient and iron-replete cells. Cells were grown in defined-iron medium containing 5  $\mu\text{M}$  or 300  $\mu\text{M}$  ferrous iron and glycogen levels measured. Error bars indicate SEM.

Table S3. Regulation of amino acid-related transcripts in iron deficiency.

| <b>Amino Acid Transcripts Up-Regulated in Iron Deficiency</b> |                    |                                                   |                   |
|---------------------------------------------------------------|--------------------|---------------------------------------------------|-------------------|
| <b>Gene</b>                                                   | <b>Fold Change</b> | <b>Function</b>                                   | <b>Amino Acid</b> |
| PTR3                                                          | 1.75 <sup>1</sup>  | Amino acid sensor                                 | Amino acids       |
| ARG80                                                         | 1.61               | Transcription factor ARG genes                    | Arg               |
| ARG3                                                          | 1.55               | Ornithine carbamoyltransferase                    | Arg               |
| VBA3                                                          | 3.51               | Vacuolar basic amino acid permease                | Arg, Lys          |
| ALP1                                                          | 1.87               | Arginine transporter                              | Arg, Lys          |
| GTO3                                                          | 11.80              | Omega class glutathione transferase               | Cys, Met          |
| YCT1                                                          | 3.98               | Cysteine-specific transporter                     | Cys, Met          |
| ECM4                                                          | 2.89               | Omega class glutathione transferase               | Cys, Met          |
| MET2                                                          | 2.52               | L-homoserine-O-acetyltransferase                  | Cys, Met          |
| MMP1                                                          | 2.13               | S-methylmethionine permease                       | Cys, Met          |
| BDS1                                                          | 1.87               | Sulfatase                                         | Cys, Met          |
| SUL2                                                          | 1.77               | Sulfate permease                                  | Cys, Met          |
| LAP3                                                          | 1.74               | Cysteine aminopeptidase                           | Cys, Met          |
| STR3                                                          | 1.54               | Cystathionine beta-lyase                          | Cys, Met          |
| SNO1                                                          | 2.60               | Glutamine amido transferase                       | Gln               |
| GDH3                                                          | 4.52               | Glutamate dehydrogenase                           | Glu               |
| TMT1                                                          | 4.73               | Trans-aconitate methyltransferase                 | Leu               |
| OAC1                                                          | 1.72               | Mitochondrial carrier, isopropylmalate transport  | Leu               |
| BAT2                                                          | 2.42               | Branched-chain amino acid aminotransferase        | Leu, Ile, Val     |
| BAP2                                                          | 12.93              | Leucine permease                                  | Leu, Ile, Val     |
| NMA2                                                          | 2.00               | Nicotinic acid mononucleotide adenylyltransferase | Trp               |
| HBN1                                                          | 5.34               | Nitroreductases                                   | Tyr, Phe, Trp     |
| FRM2                                                          | 4.18               | Nitroreductases                                   | Tyr, Phe, Trp     |

| <b>Amino Acid Transcripts Down-Regulated in Iron Deficiency</b> |                    |                                             |                                  |
|-----------------------------------------------------------------|--------------------|---------------------------------------------|----------------------------------|
| <b>Gene</b>                                                     | <b>Fold Change</b> | <b>Function</b>                             | <b>Amino Acid</b>                |
| <b>ACO1</b> <sup>2</sup>                                        | 1.71               | Aconitase                                   | Glu                              |
| <b>GLT1</b>                                                     | 5.97               | NAD(+)-dependent glutamate synthase (GOGAT) | Glu                              |
| <b>ILV3</b>                                                     | 1.57               | Dihydroxyacid dehydratase                   | Leu, Ile, Val                    |
| <b>MET5</b>                                                     | 1.57               | Sulfite reductase beta subunit              | Cys, Met                         |
| <b>LEU1</b>                                                     | 1.50               | Isopropylmalate isomerase                   | Leu                              |
| <b>LYS4</b>                                                     | 2.12               | Homoaconitase                               | Lys                              |
| PUT4                                                            | 1.81               | Proline permease                            | Pro                              |
|                                                                 |                    |                                             | Leu, Ile, Val,<br>Met, Tyr, Phe, |
| ARO10                                                           | 1.61               | Phenylpyruvate decarboxylase                | Trp                              |

<sup>1</sup>Arrays were performed in triplicate and the average fold change is shown. Transcripts with 1.5-fold or greater change and  $p < 0.05$  shown.

<sup>2</sup>Genes in bold face encode Fe-S cluster proteins.

Figure S3.

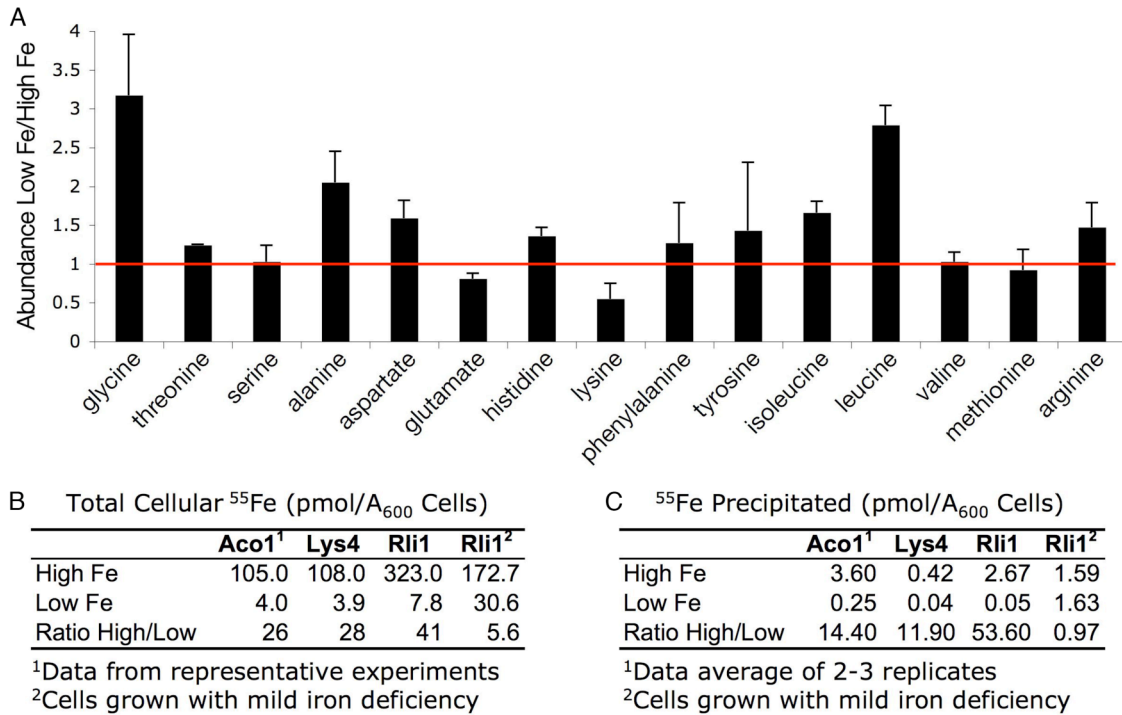

**Figure S3. Lack of amino acid deficiencies in iron-deficient cells despite loss of iron-sulfur clusters.** (A) Cells were grown in defined-iron medium containing 5-10  $\mu\text{M}$  (Low Iron) or 300  $\mu\text{M}$  (High Iron) ferrous iron for 24 hrs. Levels of amino acids were measured and expressed as a ratio. Values greater than 1 indicate accumulation in iron-deficient cells. Error bars indicate SEM. (B) Total cellular iron in cells labeled with  $^{55}\text{Fe}$  and (C) Iron bound to Fe-S enzymes from cells labeled with  $^{55}\text{Fe}$ . Strains expressing Aco1-TAP, Lys4-TAP, and Rli1-TAP were labeled with  $^{55}\text{Fe}$  in iron-sufficient medium, then cells were re-inoculated into either iron-chelated or iron-replete medium containing  $^{55}\text{Fe}$  of the same concentration and specific activity and grown for an additional 7 generations.
